# Supplementary material for: The Key Factors Predicting Dementia in Individuals With Alzheimer’s Disease-Type Pathology
Source: Front Aging Neurosci. 2022 Apr 25;14:831967. doi: 10.3389/fnagi.2022.831967 (PMC9085578; doi:10.3389/fnagi.2022.831967)
Supplement: Supplementary Table 1 — Complete Boruta results from the RNA sequencing analyses. [file Table_1.XLSX]

## Sheet: Dementia vs NCI
ensembl_gene_id	hgnc_symbol	z_score	entrezgene	description	chromosome_name	start_position	end_position	strand	Direction in dementia
ENSG00000196415	PRTN3	7.51	5657	proteinase 3 [Source:HGNC Symbol;Acc:HGNC:9495]	19	840999	848175	1	Down
ENSG00000088836	SLC4A11	6.6	83959	solute carrier family 4 member 11 [Source:HGNC Symbol;Acc:HGNC:16438]	20	3227417	3239559	-1	Up
ENSG00000105419	MEIS3	6.06	56917	Meis homeobox 3 [Source:HGNC Symbol;Acc:HGNC:29537]	19	47403124	47419527	-1	Down
ENSG00000204310	AGPAT1	6.05	10554	1-acylglycerol-3-phosphate O-acyltransferase 1 [Source:HGNC Symbol;Acc:HGNC:324]	6	32168212	32178096	-1	Down
ENSG00000280832	GSEC	5.93	NA	G-quadruplex forming sequence containing lncRNA [Source:HGNC Symbol;Acc:HGNC:48645]	11	126340889	126355587	-1	Down
ENSG00000125534	PPDPF	5.82	79144	pancreatic progenitor cell differentiation and proliferation factor [Source:HGNC Symbol;Acc:HGNC:16142]	20	63520765	63522206	1	Down
ENSG00000204959	ARHGEF34P	5.58	NA	Rho guanine nucleotide exchange factor 34, pseudogene [Source:HGNC Symbol;Acc:HGNC:38086]	7	144272445	144286966	-1	Up
ENSG00000242220	TCP10L	5.51	140290	t-complex 10 like [Source:HGNC Symbol;Acc:HGNC:11657]	21	32497967	32587373	-1	Down
ENSG00000164136	IL15	5.49	3600	interleukin 15 [Source:HGNC Symbol;Acc:HGNC:5977]	4	141636583	141733987	1	Up
ENSG00000105245	NUMBL	4.9	9253	NUMB like endocytic adaptor protein [Source:HGNC Symbol;Acc:HGNC:8061]	19	40665905	40690972	-1	Down
ENSG00000198081	ZBTB14	4.89	7541	zinc finger and BTB domain containing 14 [Source:HGNC Symbol;Acc:HGNC:12860]	18	5289019	5297053	-1	Up
ENSG00000258738		4.88	NA	novel transcript, antisense to BAZ1A	14	34874343	34876459	1	Up
ENSG00000051009	FAM160A2	4.72	84067	family with sequence similarity 160 member A2 [Source:HGNC Symbol;Acc:HGNC:25378]	11	6211335	6234711	-1	Down
ENSG00000278911		4.63	NA	novel transcript	18	75103587	75106260	-1	Down
ENSG00000198830	HMGN2	4.59	3151	high mobility group nucleosomal binding domain 2 [Source:HGNC Symbol;Acc:HGNC:4986]	1	26472440	26476642	1	Down
ENSG00000142765	SYTL1	4.53	84958	synaptotagmin like 1 [Source:HGNC Symbol;Acc:HGNC:15584]	1	27342020	27353937	1	Up
ENSG00000100949	RABGGTA	4.49	5875	Rab geranylgeranyltransferase subunit alpha [Source:HGNC Symbol;Acc:HGNC:9795]	14	24265538	24271739	-1	Up
ENSG00000246363	LINC02458	4.33	NA	long intergenic non-protein coding RNA 2458 [Source:HGNC Symbol;Acc:HGNC:53394]	12	89010681	89309566	-1	Down
ENSG00000259820		4.3	NA	novel transcript	8	134792020	134798272	-1	Down
ENSG00000187984	ANKRD19P	4.27	NA	ankyrin repeat domain 19, pseudogene [Source:HGNC Symbol;Acc:HGNC:22567]	9	92809568	92838457	1	Down
ENSG00000105643	ARRDC2	4.25	27106	arrestin domain containing 2 [Source:HGNC Symbol;Acc:HGNC:25225]	19	18001132	18014102	1	Up
ENSG00000254858	MPV17L2	4.2	84769	MPV17 mitochondrial inner membrane protein like 2 [Source:HGNC Symbol;Acc:HGNC:28177]	19	18193218	18196948	1	Down
ENSG00000053702	NRIP2	4.16	83714	nuclear receptor interacting protein 2 [Source:HGNC Symbol;Acc:HGNC:23078]	12	2825348	2835544	-1	Up
ENSG00000260257		4.09	NA	novel transcript	20	32856621	32858751	1	Up
ENSG00000105650	PDE4C	4.07	5143	phosphodiesterase 4C [Source:HGNC Symbol;Acc:HGNC:8782]	19	18208652	18248200	-1	Down
ENSG00000198624	CCDC69	4.03	26112	coiled-coil domain containing 69 [Source:HGNC Symbol;Acc:HGNC:24487]	5	151181052	151224093	-1	Up
ENSG00000170312	CDK1	3.79	983	cyclin dependent kinase 1 [Source:HGNC Symbol;Acc:HGNC:1722]	10	60778331	60794852	1	Down
ENSG00000183963	SMTN	3.78	6525	smoothelin [Source:HGNC Symbol;Acc:HGNC:11126]	22	31064105	31104757	1	Up
ENSG00000256422	LINC02552	3.71	NA	long intergenic non-protein coding RNA 2552 [Source:HGNC Symbol;Acc:HGNC:53587]	11	104445868	104609498	-1	Down
ENSG00000233123	LINC01007	3.7	NA	long intergenic non-protein coding RNA 1007 [Source:HGNC Symbol;Acc:HGNC:48973]	7	101562779	101569006	-1	Down
ENSG00000164978	NUDT2	3.55	318	nudix hydrolase 2 [Source:HGNC Symbol;Acc:HGNC:8049]	9	34329506	34343711	1	Down
ENSG00000171388	APLN	3.52	8862	apelin [Source:HGNC Symbol;Acc:HGNC:16665]	X	129645259	129654956	-1	Up
ENSG00000196517	SLC6A9	3.47	6536	solute carrier family 6 member 9 [Source:HGNC Symbol;Acc:HGNC:11056]	1	43991500	44031467	-1	Up
ENSG00000111181	SLC6A12	3.39	6539	solute carrier family 6 member 12 [Source:HGNC Symbol;Acc:HGNC:11045]	12	190077	214570	-1	Up
ENSG00000086159	AQP6	3.39	363	aquaporin 6 [Source:HGNC Symbol;Acc:HGNC:639]	12	49967194	49977139	1	Up
ENSG00000110169	HPX	3.34	3263	hemopexin [Source:HGNC Symbol;Acc:HGNC:5171]	11	6431049	6442617	-1	Down
ENSG00000260583		3.31	NA	novel transcript, antisense to MRPL39	21	25582770	25583326	-1	Down
ENSG00000019186	CYP24A1	3.31	1591	cytochrome P450 family 24 subfamily A member 1 [Source:HGNC Symbol;Acc:HGNC:2602]	20	54153446	54173986	-1	Down
ENSG00000116661	FBXO2	3.28	26232	F-box protein 2 [Source:HGNC Symbol;Acc:HGNC:13581]	1	11637018	11655785	-1	Up
ENSG00000171476	HOPX	3.26	84525	HOP homeobox [Source:HGNC Symbol;Acc:HGNC:24961]	4	56647988	56681899	-1	Down
ENSG00000158169	FANCC	3.22	2176	FA complementation group C [Source:HGNC Symbol;Acc:HGNC:3584]	9	95099054	95426796	-1	Up
ENSG00000272755		3.08	NA	novel transcript	1	149264252	149264816	1	Up
ENSG00000125772	GPCPD1	3.04	56261	glycerophosphocholine phosphodiesterase 1 [Source:HGNC Symbol;Acc:HGNC:26957]	20	5544439	5611006	-1	Down
ENSG00000051128	HOMER3	3.02	9454	homer scaffold protein 3 [Source:HGNC Symbol;Acc:HGNC:17514]	19	18929201	18941261	-1	Up
ENSG00000134215	VAV3	2.86	10451	vav guanine nucleotide exchange factor 3 [Source:HGNC Symbol;Acc:HGNC:12659]	1	107571161	107965180	-1	Up
ENSG00000186188	FFAR4	2.75	338557	free fatty acid receptor 4 [Source:HGNC Symbol;Acc:HGNC:19061]	10	93566665	93604480	1	Down

## Sheet: Dementia vs MCI
ensembl_gene_id	hgnc_symbol	z_score	entrezgene	description	chromosome_name	start_position	end_position	strand	Direction in dementia
ENSG00000136875	PRPF4	7.59	9128	pre-mRNA processing factor 4 [Source:HGNC Symbol;Acc:HGNC:17349]	9	113275343	113292905	1	Down
ENSG00000087116	ADAMTS2	5.82	9509	ADAM metallopeptidase with thrombospondin type 1 motif 2 [Source:HGNC Symbol;Acc:HGNC:218]	5	179110853	179345461	-1	Up
ENSG00000237506	RPSAP15	5.81	NA	ribosomal protein SA pseudogene 15 [Source:HGNC Symbol;Acc:HGNC:31464]	X	87703343	87704203	-1	Down
ENSG00000196415	PRTN3	5.33	5657	proteinase 3 [Source:HGNC Symbol;Acc:HGNC:9495]	19	840999	848175	1	Down
ENSG00000155980	KIF5A	5.13	3798	kinesin family member 5A [Source:HGNC Symbol;Acc:HGNC:6323]	12	57550044	57586633	1	Up
ENSG00000075073	TACR2	4.95	6865	tachykinin receptor 2 [Source:HGNC Symbol;Acc:HGNC:11527]	10	69403903	69416918	-1	Down
ENSG00000100425	BRD1	4.94	23774	bromodomain containing 1 [Source:HGNC Symbol;Acc:HGNC:1102]	22	49773283	49827512	-1	Up
ENSG00000257599	OVCH1-AS1	4.78	NA	OVCH1 antisense RNA 1 [Source:HGNC Symbol;Acc:HGNC:44484]	12	29389289	29487488	1	Down
ENSG00000180777	ANKRD30B	4.48	374860	ankyrin repeat domain 30B [Source:HGNC Symbol;Acc:HGNC:24165]	18	14728272	14854038	1	Down
ENSG00000175206	NPPA	4.36	4878	natriuretic peptide A [Source:HGNC Symbol;Acc:HGNC:7939]	1	11845709	11848345	-1	Down
ENSG00000171960	PPIH	4.17	10465	peptidylprolyl isomerase H [Source:HGNC Symbol;Acc:HGNC:14651]	1	42658423	42676758	1	Down
ENSG00000125534	PPDPF	4	79144	pancreatic progenitor cell differentiation and proliferation factor [Source:HGNC Symbol;Acc:HGNC:16142]	20	63520765	63522206	1	Down
ENSG00000254838	GVINP1	3.99	NA	GTPase, very large interferon inducible pseudogene 1 [Source:HGNC Symbol;Acc:HGNC:25813]	11	6713536	6746439	-1	Up
ENSG00000130294	KIF1A	3.64	547	kinesin family member 1A [Source:HGNC Symbol;Acc:HGNC:888]	2	240713761	240821036	-1	Up
ENSG00000165288	BRWD3	3.58	254065	bromodomain and WD repeat domain containing 3 [Source:HGNC Symbol;Acc:HGNC:17342]	X	80669503	80809877	-1	Up
ENSG00000006047	YBX2	3.47	51087	Y-box binding protein 2 [Source:HGNC Symbol;Acc:HGNC:17948]	17	7288263	7294639	-1	Down
ENSG00000263571		3.45	NA	novel transcript	17	34155566	34165736	1	Up
ENSG00000283417		3.39	NA	novel transcript	17	33791838	33816761	-1	Up
ENSG00000166716	ZNF592	3.23	9640	zinc finger protein 592 [Source:HGNC Symbol;Acc:HGNC:28986]	15	84748592	84806445	1	Up
ENSG00000267855	NDUFA7	3.1	4701	NADH:ubiquinone oxidoreductase subunit A7 [Source:HGNC Symbol;Acc:HGNC:7691]	19	8308768	8321375	-1	Down
ENSG00000233622	CYP2T1P	2.83	NA	cytochrome P450 family 2 subfamily T member 1, pseudogene [Source:HGNC Symbol;Acc:HGNC:18852]	19	40808474	40812100	-1	Down
ENSG00000224596	ZMIZ1-AS1	2.78	NA	ZMIZ1 antisense RNA 1 [Source:HGNC Symbol;Acc:HGNC:27433]	10	78943328	79067895	-1	Down

## Sheet: MCI vs NCI
ensembl_gene_id	hgnc_symbol	z_score	entrezgene	description	chromosome_name	start_position	end_position	strand	Direction in MCI
ENSG00000258738		10.34	NA	novel transcript, antisense to BAZ1A	14	34874343	34876459	1	Up
ENSG00000132967	HMGB1P5	9.12	NA	high mobility group box 1 pseudogene 5 [Source:HGNC Symbol;Acc:HGNC:4997]	3	22381819	22382929	1	Up
ENSG00000256269	HMBS	6.75	3145	hydroxymethylbilane synthase [Source:HGNC Symbol;Acc:HGNC:4982]	11	119084866	119093549	1	Up
ENSG00000139629	GALNT6	6.69	11226	polypeptide N-acetylgalactosaminyltransferase 6 [Source:HGNC Symbol;Acc:HGNC:4128]	12	51351247	51392867	-1	Up
ENSG00000105650	PDE4C	5.16	5143	phosphodiesterase 4C [Source:HGNC Symbol;Acc:HGNC:8782]	19	18208652	18248200	-1	Down
ENSG00000146555	SDK1	4.51	221935	sidekick cell adhesion molecule 1 [Source:HGNC Symbol;Acc:HGNC:19307]	7	3301252	4269000	1	Down

## Sheet: Episodic memory fast vs slow
ensembl_gene_id	hgnc_symbol	z_score	entrezgene	description	chromosome_name	start_position	end_position	strand	Direction in fast decline
ENSG00000196415	PRTN3	7.47	5657	proteinase 3 [Source:HGNC Symbol;Acc:HGNC:9495]	19	840999	848175	1	Down
ENSG00000087116	ADAMTS2	6.22	9509	ADAM metallopeptidase with thrombospondin type 1 motif 2 [Source:HGNC Symbol;Acc:HGNC:218]	5	179110853	179345461	-1	Up
ENSG00000170836	PPM1D	5.92	8493	protein phosphatase, Mg2+/Mn2+ dependent 1D [Source:HGNC Symbol;Acc:HGNC:9277]	17	60600183	60666280	1	Up
ENSG00000216895		5.3	NA	novel transcript, antisense to RBM33	7	155611231	155645205	-1	Down
ENSG00000251632	LINC02172	5.18	NA	long intergenic non-protein coding RNA 2172 [Source:HGNC Symbol;Acc:HGNC:53034]	4	137545731	137603430	1	Up
ENSG00000196517	SLC6A9	4.95	6536	solute carrier family 6 member 9 [Source:HGNC Symbol;Acc:HGNC:11056]	1	43991500	44031467	-1	Up
ENSG00000224812	TMEM72-AS1	4.88	NA	TMEM72 antisense RNA 1 [Source:HGNC Symbol;Acc:HGNC:27349]	10	44793119	44959709	-1	Down
ENSG00000154845	PPP4R1	4.8	9989	protein phosphatase 4 regulatory subunit 1 [Source:HGNC Symbol;Acc:HGNC:9320]	18	9546791	9615240	-1	Up
ENSG00000151552	QDPR	4.57	5860	quinoid dihydropteridine reductase [Source:HGNC Symbol;Acc:HGNC:9752]	4	17460261	17512206	-1	Up
ENSG00000198185	ZNF334	4.56	55713	zinc finger protein 334 [Source:HGNC Symbol;Acc:HGNC:15806]	20	46499630	46513559	-1	Down
ENSG00000088836	SLC4A11	4.51	83959	solute carrier family 4 member 11 [Source:HGNC Symbol;Acc:HGNC:16438]	20	3227417	3239559	-1	Up
ENSG00000283646	LINC02009	4.51	NA	long intergenic non-protein coding RNA 2009 [Source:HGNC Symbol;Acc:HGNC:52845]	3	46416524	46423591	-1	Down
ENSG00000187984	ANKRD19P	4.49	NA	ankyrin repeat domain 19, pseudogene [Source:HGNC Symbol;Acc:HGNC:22567]	9	92809568	92838457	1	Down
ENSG00000167011	NAT16	4.49	375607	N-acetyltransferase 16 (putative) [Source:HGNC Symbol;Acc:HGNC:22030]	7	101170496	101180293	-1	Down
ENSG00000251423		4.44	NA	novel transcript	5	13860303	13901036	1	Down
ENSG00000155329	ZCCHC10	4.4	54819	zinc finger CCHC-type containing 10 [Source:HGNC Symbol;Acc:HGNC:25954]	5	132996985	133026604	-1	Down
ENSG00000173588	CEP83	4.37	51134	centrosomal protein 83 [Source:HGNC Symbol;Acc:HGNC:17966]	12	94306449	94459988	-1	Down
ENSG00000011132	APBA3	4.33	9546	amyloid beta precursor protein binding family A member 3 [Source:HGNC Symbol;Acc:HGNC:580]	19	3750772	3761692	-1	No Change
ENSG00000051009	FAM160A2	4.31	84067	family with sequence similarity 160 member A2 [Source:HGNC Symbol;Acc:HGNC:25378]	11	6211335	6234711	-1	Down
ENSG00000188783	PRELP	4.29	5549	proline and arginine rich end leucine rich repeat protein [Source:HGNC Symbol;Acc:HGNC:9357]	1	203475806	203491352	1	Up
ENSG00000187595	ZNF385C	4.17	201181	zinc finger protein 385C [Source:HGNC Symbol;Acc:HGNC:33722]	17	42025576	42098479	-1	Down
ENSG00000101298	SNPH	4.16	9751	syntaphilin [Source:HGNC Symbol;Acc:HGNC:15931]	20	1266280	1309328	1	Up
ENSG00000104415	CCN4	4.15	8840	cellular communication network factor 4 [Source:HGNC Symbol;Acc:HGNC:12769]	8	133191039	133231690	1	Up
ENSG00000225492	GBP1P1	4.07	NA	guanylate binding protein 1 pseudogene 1 [Source:HGNC Symbol;Acc:HGNC:39561]	1	89407679	89426243	1	Down
ENSG00000119950	MXI1	4.06	4601	MAX interactor 1, dimerization protein [Source:HGNC Symbol;Acc:HGNC:7534]	10	110207605	110287365	1	Up
ENSG00000280157		3.96	NA	TEC	1	228121523	228123771	1	Down
ENSG00000133121	STARD13	3.95	90627	StAR related lipid transfer domain containing 13 [Source:HGNC Symbol;Acc:HGNC:19164]	13	33103137	33350630	-1	Up
ENSG00000081923	ATP8B1	3.91	5205	ATPase phospholipid transporting 8B1 [Source:HGNC Symbol;Acc:HGNC:3706]	18	57646426	57803315	-1	Down
ENSG00000280832	GSEC	3.86	NA	G-quadruplex forming sequence containing lncRNA [Source:HGNC Symbol;Acc:HGNC:48645]	11	126340889	126355587	-1	Down
ENSG00000186891	TNFRSF18	3.78	8784	TNF receptor superfamily member 18 [Source:HGNC Symbol;Acc:HGNC:11914]	1	1203508	1206592	-1	Down
ENSG00000166012	TAF1D	3.76	79101	TATA-box binding protein associated factor, RNA polymerase I subunit D [Source:HGNC Symbol;Acc:HGNC:28759]	11	93729948	93784391	-1	Down
ENSG00000106069	CHN2	3.72	1124	chimerin 2 [Source:HGNC Symbol;Acc:HGNC:1944]	7	29146569	29514328	1	Up
ENSG00000130294	KIF1A	3.72	547	kinesin family member 1A [Source:HGNC Symbol;Acc:HGNC:888]	2	240713761	240821036	-1	Up
ENSG00000204977	TRIM13	3.69	10206	tripartite motif containing 13 [Source:HGNC Symbol;Acc:HGNC:9976]	13	49995888	50020481	1	Up
ENSG00000180422	LINC00304	3.67	NA	long intergenic non-protein coding RNA 304 [Source:HGNC Symbol;Acc:HGNC:26713]	16	89159146	89164245	1	Up
ENSG00000011426	ANLN	3.66	54443	anillin actin binding protein [Source:HGNC Symbol;Acc:HGNC:14082]	7	36389821	36453791	1	Up
ENSG00000086159	AQP6	3.61	363	aquaporin 6 [Source:HGNC Symbol;Acc:HGNC:639]	12	49967194	49977139	1	Up
ENSG00000184903	IMMP2L	3.58	83943	inner mitochondrial membrane peptidase subunit 2 [Source:HGNC Symbol;Acc:HGNC:14598]	7	110662644	111562517	-1	Down
ENSG00000171552	BCL2L1	3.58	598	BCL2 like 1 [Source:HGNC Symbol;Acc:HGNC:992]	20	31664452	31723989	-1	Up
ENSG00000140488	CELF6	3.51	60677	CUGBP Elav-like family member 6 [Source:HGNC Symbol;Acc:HGNC:14059]	15	72284727	72320157	-1	Down
ENSG00000120729	MYOT	3.46	9499	myotilin [Source:HGNC Symbol;Acc:HGNC:12399]	5	137867858	137887851	1	Up
ENSG00000170759	KIF5B	3.45	3799	kinesin family member 5B [Source:HGNC Symbol;Acc:HGNC:6324]	10	32009015	32056425	-1	Up
ENSG00000105287	PRKD2	3.39	25865	protein kinase D2 [Source:HGNC Symbol;Acc:HGNC:17293]	19	46674275	46717127	-1	Up
ENSG00000249436		3.37	NA	novel transcript	5	57574027	57619816	1	Down
ENSG00000164105	SAP30	3.36	8819	Sin3A associated protein 30 [Source:HGNC Symbol;Acc:HGNC:10532]	4	173369969	173377532	1	Up
ENSG00000175390	EIF3F	3.36	8665	eukaryotic translation initiation factor 3 subunit F [Source:HGNC Symbol;Acc:HGNC:3275]	11	7970251	8001862	1	Down
ENSG00000111911	HINT3	3.35	135114	histidine triad nucleotide binding protein 3 [Source:HGNC Symbol;Acc:HGNC:18468]	6	125956770	125980244	1	Up
ENSG00000111181	SLC6A12	3.31	6539	solute carrier family 6 member 12 [Source:HGNC Symbol;Acc:HGNC:11045]	12	190077	214570	-1	Up
ENSG00000139631	CSAD	3.3	51380	cysteine sulfinic acid decarboxylase [Source:HGNC Symbol;Acc:HGNC:18966]	12	53157663	53180909	-1	Down
ENSG00000179029	TMEM107	3.24	84314	transmembrane protein 107 [Source:HGNC Symbol;Acc:HGNC:28128]	17	8172457	8176399	-1	Down
ENSG00000198574	SH2D1B	3.23	117157	SH2 domain containing 1B [Source:HGNC Symbol;Acc:HGNC:30416]	1	162395268	162412138	-1	Up
ENSG00000100906	NFKBIA	3.11	4792	NFKB inhibitor alpha [Source:HGNC Symbol;Acc:HGNC:7797]	14	35401511	35404749	-1	Up
ENSG00000254858	MPV17L2	3.11	84769	MPV17 mitochondrial inner membrane protein like 2 [Source:HGNC Symbol;Acc:HGNC:28177]	19	18193218	18196948	1	Down
ENSG00000135678	CPM	3.03	1368	carboxypeptidase M [Source:HGNC Symbol;Acc:HGNC:2311]	12	68842197	68971570	-1	Up
ENSG00000166716	ZNF592	2.96	9640	zinc finger protein 592 [Source:HGNC Symbol;Acc:HGNC:28986]	15	84748592	84806445	1	Up
ENSG00000124795	DEK	2.91	7913	DEK proto-oncogene [Source:HGNC Symbol;Acc:HGNC:2768]	6	18223860	18264548	-1	Up
ENSG00000233123	LINC01007	2.88	NA	long intergenic non-protein coding RNA 1007 [Source:HGNC Symbol;Acc:HGNC:48973]	7	101562779	101569006	-1	Down
ENSG00000105643	ARRDC2	2.86	27106	arrestin domain containing 2 [Source:HGNC Symbol;Acc:HGNC:25225]	19	18001132	18014102	1	Up
ENSG00000173926	MARCHF3	2.84	115123	membrane associated ring-CH-type finger 3 [Source:HGNC Symbol;Acc:HGNC:28728]	5	126867714	127030558	-1	Up
ENSG00000101363	MANBAL	2.83	63905	mannosidase beta like [Source:HGNC Symbol;Acc:HGNC:15799]	20	37289638	37317260	1	Down
ENSG00000114126	TFDP2	2.83	7029	transcription factor Dp-2 [Source:HGNC Symbol;Acc:HGNC:11751]	3	141944428	142149544	-1	Up
ENSG00000256193	LINC00507	2.81	NA	long intergenic non-protein coding RNA 507 [Source:HGNC Symbol;Acc:HGNC:43558]	12	127914707	127960028	1	Down
ENSG00000133138	TBC1D8B	2.75	54885	TBC1 domain family member 8B [Source:HGNC Symbol;Acc:HGNC:24715]	X	106802673	106876150	1	Up

## Sheet: Global cognition fast vs slow
ensembl_gene_id	hgnc_symbol	z_score	entrezgene	description	chromosome_name	start_position	end_position	strand	Direction in fast decline
ENSG00000196415	PRTN3	8.83	5657	proteinase 3 [Source:HGNC Symbol;Acc:HGNC:9495]	19	840999	848175	1	Down
ENSG00000280832	GSEC	7.1	NA	G-quadruplex forming sequence containing lncRNA [Source:HGNC Symbol;Acc:HGNC:48645]	11	126340889	126355587	-1	Down
ENSG00000166012	TAF1D	6.58	79101	TATA-box binding protein associated factor, RNA polymerase I subunit D [Source:HGNC Symbol;Acc:HGNC:28759]	11	93729948	93784391	-1	Down
ENSG00000087116	ADAMTS2	5.98	9509	ADAM metallopeptidase with thrombospondin type 1 motif 2 [Source:HGNC Symbol;Acc:HGNC:218]	5	179110853	179345461	-1	Up
ENSG00000058866	DGKG	5.81	1608	diacylglycerol kinase gamma [Source:HGNC Symbol;Acc:HGNC:2853]	3	186105668	186362234	-1	Up
ENSG00000186891	TNFRSF18	5.73	8784	TNF receptor superfamily member 18 [Source:HGNC Symbol;Acc:HGNC:11914]	1	1203508	1206592	-1	Down
ENSG00000246877	DNM1P35	5.46	NA	dynamin 1 pseudogene 35 [Source:HGNC Symbol;Acc:HGNC:35182]	15	75727670	75738623	-1	Down
ENSG00000088836	SLC4A11	5.39	83959	solute carrier family 4 member 11 [Source:HGNC Symbol;Acc:HGNC:16438]	20	3227417	3239559	-1	Up
ENSG00000183971	NPW	5.38	283869	neuropeptide W [Source:HGNC Symbol;Acc:HGNC:30509]	16	2009926	2020755	1	Down
ENSG00000164175	SLC45A2	5.25	51151	solute carrier family 45 member 2 [Source:HGNC Symbol;Acc:HGNC:16472]	5	33944623	33984693	-1	Up
ENSG00000100906	NFKBIA	5.05	4792	NFKB inhibitor alpha [Source:HGNC Symbol;Acc:HGNC:7797]	14	35401511	35404749	-1	Up
ENSG00000283646	LINC02009	4.73	NA	long intergenic non-protein coding RNA 2009 [Source:HGNC Symbol;Acc:HGNC:52845]	3	46416524	46423591	-1	Down
ENSG00000187984	ANKRD19P	4.51	NA	ankyrin repeat domain 19, pseudogene [Source:HGNC Symbol;Acc:HGNC:22567]	9	92809568	92838457	1	Down
ENSG00000159674	SPON2	4.47	10417	spondin 2 [Source:HGNC Symbol;Acc:HGNC:11253]	4	1166932	1208962	-1	Down
ENSG00000249436		4.4	NA	novel transcript	5	57574027	57619816	1	Down
ENSG00000178752	ERFE	4.36	151176	erythroferrone [Source:HGNC Symbol;Acc:HGNC:26727]	2	238158970	238168900	1	Down
ENSG00000130294	KIF1A	4.35	547	kinesin family member 1A [Source:HGNC Symbol;Acc:HGNC:888]	2	240713761	240821036	-1	Up
ENSG00000164136	IL15	4.26	3600	interleukin 15 [Source:HGNC Symbol;Acc:HGNC:5977]	4	141636583	141733987	1	Up
ENSG00000151552	QDPR	4.19	5860	quinoid dihydropteridine reductase [Source:HGNC Symbol;Acc:HGNC:9752]	4	17460261	17512206	-1	Up
ENSG00000105419	MEIS3	4.18	56917	Meis homeobox 3 [Source:HGNC Symbol;Acc:HGNC:29537]	19	47403124	47419527	-1	Down
ENSG00000079432	CIC	4.09	23152	capicua transcriptional repressor [Source:HGNC Symbol;Acc:HGNC:14214]	19	42268537	42295797	1	Up
ENSG00000053702	NRIP2	3.88	83714	nuclear receptor interacting protein 2 [Source:HGNC Symbol;Acc:HGNC:23078]	12	2825348	2835544	-1	Up
ENSG00000164978	NUDT2	3.83	318	nudix hydrolase 2 [Source:HGNC Symbol;Acc:HGNC:8049]	9	34329506	34343711	1	Down
ENSG00000051009	FAM160A2	3.81	84067	family with sequence similarity 160 member A2 [Source:HGNC Symbol;Acc:HGNC:25378]	11	6211335	6234711	-1	Down
ENSG00000272755		3.8	NA	novel transcript	1	149264252	149264816	1	Up
ENSG00000278911		3.77	NA	novel transcript	18	75103587	75106260	-1	Down
ENSG00000187595	ZNF385C	3.73	201181	zinc finger protein 385C [Source:HGNC Symbol;Acc:HGNC:33722]	17	42025576	42098479	-1	Down
ENSG00000260257		3.67	NA	novel transcript	20	32856621	32858751	1	Up
ENSG00000099381	SETD1A	3.66	9739	SET domain containing 1A, histone lysine methyltransferase [Source:HGNC Symbol;Acc:HGNC:29010]	16	30957754	30984664	1	Up
ENSG00000198185	ZNF334	3.64	55713	zinc finger protein 334 [Source:HGNC Symbol;Acc:HGNC:15806]	20	46499630	46513559	-1	Down
ENSG00000198830	HMGN2	3.61	3151	high mobility group nucleosomal binding domain 2 [Source:HGNC Symbol;Acc:HGNC:4986]	1	26472440	26476642	1	Down
ENSG00000196517	SLC6A9	3.52	6536	solute carrier family 6 member 9 [Source:HGNC Symbol;Acc:HGNC:11056]	1	43991500	44031467	-1	Up
ENSG00000077943	ITGA8	3.52	8516	integrin subunit alpha 8 [Source:HGNC Symbol;Acc:HGNC:6144]	10	15513954	15719922	-1	Up
ENSG00000111206	FOXM1	3.5	2305	forkhead box M1 [Source:HGNC Symbol;Acc:HGNC:3818]	12	2857681	2877155	-1	Up
ENSG00000184903	IMMP2L	3.44	83943	inner mitochondrial membrane peptidase subunit 2 [Source:HGNC Symbol;Acc:HGNC:14598]	7	110662644	111562517	-1	Down
ENSG00000170836	PPM1D	3.29	8493	protein phosphatase, Mg2+/Mn2+ dependent 1D [Source:HGNC Symbol;Acc:HGNC:9277]	17	60600183	60666280	1	Up
ENSG00000135447	PPP1R1A	3.21	5502	protein phosphatase 1 regulatory inhibitor subunit 1A [Source:HGNC Symbol;Acc:HGNC:9286]	12	54575387	54588659	-1	Up
ENSG00000106631	MYL7	3.17	58498	myosin light chain 7 [Source:HGNC Symbol;Acc:HGNC:21719]	7	44138864	44141332	-1	Down
ENSG00000186188	FFAR4	3.14	338557	free fatty acid receptor 4 [Source:HGNC Symbol;Acc:HGNC:19061]	10	93566665	93604480	1	Down
ENSG00000048052	HDAC9	3.07	9734	histone deacetylase 9 [Source:HGNC Symbol;Acc:HGNC:14065]	7	18086949	19002416	1	Down
ENSG00000086159	AQP6	3.03	363	aquaporin 6 [Source:HGNC Symbol;Acc:HGNC:639]	12	49967194	49977139	1	Up
ENSG00000140564	FURIN	3.02	5045	furin, paired basic amino acid cleaving enzyme [Source:HGNC Symbol;Acc:HGNC:8568]	15	90868588	90883458	1	Up
ENSG00000166716	ZNF592	3.01	9640	zinc finger protein 592 [Source:HGNC Symbol;Acc:HGNC:28986]	15	84748592	84806445	1	Up
ENSG00000104415	CCN4	2.97	8840	cellular communication network factor 4 [Source:HGNC Symbol;Acc:HGNC:12769]	8	133191039	133231690	1	Up
ENSG00000158793	NIT1	2.95	4817	nitrilase 1 [Source:HGNC Symbol;Acc:HGNC:7828]	1	161118086	161125445	1	Down
ENSG00000267092		2.92	NA	novel transcript, antisense to ADAMTSL5	19	1508375	1508963	1	Down
ENSG00000276462		2.81	NA	novel transcript	9	41100793	41119909	-1	Down

## Sheet: Episodic memory all
ensembl_gene_id	hgnc_symbol	z.score_ep_slope	entrezgene	description	chromosome_name	start_position	end_position	strand	Pearson correlation with episodic slope
ENSG00000196415	PRTN3	7.45	5657	proteinase 3 [Source:HGNC Symbol;Acc:HGNC:9495]	19	840999	848175	1	Positive
ENSG00000087116	ADAMTS2	6.83	9509	ADAM metallopeptidase with thrombospondin type 1 motif 2 [Source:HGNC Symbol;Acc:HGNC:218]	5	179110853	179345461	-1	Negative
ENSG00000155329	ZCCHC10	6.43	54819	zinc finger CCHC-type containing 10 [Source:HGNC Symbol;Acc:HGNC:25954]	5	132996985	133026604	-1	Positive
ENSG00000166012	TAF1D	6.3	79101	TATA-box binding protein associated factor, RNA polymerase I subunit D [Source:HGNC Symbol;Acc:HGNC:28759]	11	93729948	93784391	-1	Positive
ENSG00000104415	CCN4	5.76	8840	cellular communication network factor 4 [Source:HGNC Symbol;Acc:HGNC:12769]	8	133191039	133231690	1	Negative
ENSG00000198185	ZNF334	5.59	55713	zinc finger protein 334 [Source:HGNC Symbol;Acc:HGNC:15806]	20	46499630	46513559	-1	Positive
ENSG00000198830	HMGN2	5.48	3151	high mobility group nucleosomal binding domain 2 [Source:HGNC Symbol;Acc:HGNC:4986]	1	26472440	26476642	1	Positive
ENSG00000154845	PPP4R1	5.47	9989	protein phosphatase 4 regulatory subunit 1 [Source:HGNC Symbol;Acc:HGNC:9320]	18	9546791	9615240	-1	Negative
ENSG00000088836	SLC4A11	4.99	83959	solute carrier family 4 member 11 [Source:HGNC Symbol;Acc:HGNC:16438]	20	3227417	3239559	-1	Negative
ENSG00000187984	ANKRD19P	4.96	NA	ankyrin repeat domain 19, pseudogene [Source:HGNC Symbol;Acc:HGNC:22567]	9	92809568	92838457	1	Positive
ENSG00000251632	LINC02172	4.93	NA	long intergenic non-protein coding RNA 2172 [Source:HGNC Symbol;Acc:HGNC:53034]	4	137545731	137603430	1	Negative
ENSG00000051009	FAM160A2	4.76	84067	family with sequence similarity 160 member A2 [Source:HGNC Symbol;Acc:HGNC:25378]	11	6211335	6234711	-1	Positive
ENSG00000053702	NRIP2	4.74	83714	nuclear receptor interacting protein 2 [Source:HGNC Symbol;Acc:HGNC:23078]	12	2825348	2835544	-1	Negative
ENSG00000170836	PPM1D	4.48	8493	protein phosphatase, Mg2+/Mn2+ dependent 1D [Source:HGNC Symbol;Acc:HGNC:9277]	17	60600183	60666280	1	Negative
ENSG00000251423		4.36	NA	novel transcript	5	13860303	13901036	1	Positive
ENSG00000216895		4.25	NA	novel transcript, antisense to RBM33	7	155611231	155645205	-1	Positive
ENSG00000164978	NUDT2	4.24	318	nudix hydrolase 2 [Source:HGNC Symbol;Acc:HGNC:8049]	9	34329506	34343711	1	Positive
ENSG00000198624	CCDC69	3.84	26112	coiled-coil domain containing 69 [Source:HGNC Symbol;Acc:HGNC:24487]	5	151181052	151224093	-1	Negative
ENSG00000169064	ZBBX	3.71	79740	zinc finger B-box domain containing [Source:HGNC Symbol;Acc:HGNC:26245]	3	167240287	167381346	-1	Positive
ENSG00000283646	LINC02009	3.67	NA	long intergenic non-protein coding RNA 2009 [Source:HGNC Symbol;Acc:HGNC:52845]	3	46416524	46423591	-1	Positive
ENSG00000166716	ZNF592	3.66	9640	zinc finger protein 592 [Source:HGNC Symbol;Acc:HGNC:28986]	15	84748592	84806445	1	Negative
ENSG00000086159	AQP6	3.66	363	aquaporin 6 [Source:HGNC Symbol;Acc:HGNC:639]	12	49967194	49977139	1	Negative
ENSG00000134294	SLC38A2	3.55	54407	solute carrier family 38 member 2 [Source:HGNC Symbol;Acc:HGNC:13448]	12	46358188	46372773	-1	Negative
ENSG00000151552	QDPR	3.45	5860	quinoid dihydropteridine reductase [Source:HGNC Symbol;Acc:HGNC:9752]	4	17460261	17512206	-1	Negative
ENSG00000079134	THOC1	3.45	9984	THO complex 1 [Source:HGNC Symbol;Acc:HGNC:19070]	18	214520	268050	-1	Positive
ENSG00000125850	OVOL2	3.42	58495	ovo like zinc finger 2 [Source:HGNC Symbol;Acc:HGNC:15804]	20	17956979	18059188	-1	Positive
ENSG00000188783	PRELP	3.42	5549	proline and arginine rich end leucine rich repeat protein [Source:HGNC Symbol;Acc:HGNC:9357]	1	203475806	203491352	1	Negative
ENSG00000100906	NFKBIA	3.35	4792	NFKB inhibitor alpha [Source:HGNC Symbol;Acc:HGNC:7797]	14	35401511	35404749	-1	Negative
ENSG00000243927	MRPS6	3.3	64968	mitochondrial ribosomal protein S6 [Source:HGNC Symbol;Acc:HGNC:14051]	21	34073224	34143034	1	Negative
ENSG00000187595	ZNF385C	3.27	201181	zinc finger protein 385C [Source:HGNC Symbol;Acc:HGNC:33722]	17	42025576	42098479	-1	Positive
ENSG00000139631	CSAD	3.22	51380	cysteine sulfinic acid decarboxylase [Source:HGNC Symbol;Acc:HGNC:18966]	12	53157663	53180909	-1	Positive
ENSG00000196517	SLC6A9	2.79	6536	solute carrier family 6 member 9 [Source:HGNC Symbol;Acc:HGNC:11056]	1	43991500	44031467	-1	Negative
ENSG00000260257		2.76	NA	novel transcript	20	32856621	32858751	1	Negative
ENSG00000158169	FANCC	2.74	2176	FA complementation group C [Source:HGNC Symbol;Acc:HGNC:3584]	9	95099054	95426796	-1	Negative
ENSG00000125772	GPCPD1	2.68	56261	glycerophosphocholine phosphodiesterase 1 [Source:HGNC Symbol;Acc:HGNC:26957]	20	5544439	5611006	-1	Positive
ENSG00000100014	SPECC1L	2.63	23384	sperm antigen with calponin homology and coiled-coil domains 1 like [Source:HGNC Symbol;Acc:HGNC:29022]	22	24270817	24417739	1	Negative
ENSG00000048540	LMO3	2.63	55885	LIM domain only 3 [Source:HGNC Symbol;Acc:HGNC:6643]	12	16548372	16610594	-1	Negative
ENSG00000105655	ISYNA1	2.57	51477	inositol-3-phosphate synthase 1 [Source:HGNC Symbol;Acc:HGNC:29821]	19	18434388	18438167	-1	Negative

## Sheet: Global cognition all
ensembl_gene_id	hgnc_symbol	z.score_glob_slope	entrezgene	description	chromosome_name	start_position	end_position	strand	Pearson correlation global slope
ENSG00000188290	HES4	7.15	57801	hes family bHLH transcription factor 4 [Source:HGNC Symbol;Acc:HGNC:24149]	1	998962	1000172	-1	Positive
ENSG00000166012	TAF1D	6.79	79101	TATA-box binding protein associated factor, RNA polymerase I subunit D [Source:HGNC Symbol;Acc:HGNC:28759]	11	93729948	93784391	-1	Positive
ENSG00000087116	ADAMTS2	6.43	9509	ADAM metallopeptidase with thrombospondin type 1 motif 2 [Source:HGNC Symbol;Acc:HGNC:218]	5	179110853	179345461	-1	Negative
ENSG00000105419	MEIS3	6	56917	Meis homeobox 3 [Source:HGNC Symbol;Acc:HGNC:29537]	19	47403124	47419527	-1	Positive
ENSG00000088836	SLC4A11	5.7	83959	solute carrier family 4 member 11 [Source:HGNC Symbol;Acc:HGNC:16438]	20	3227417	3239559	-1	Negative
ENSG00000053702	NRIP2	5.49	83714	nuclear receptor interacting protein 2 [Source:HGNC Symbol;Acc:HGNC:23078]	12	2825348	2835544	-1	Negative
ENSG00000186891	TNFRSF18	5.38	8784	TNF receptor superfamily member 18 [Source:HGNC Symbol;Acc:HGNC:11914]	1	1203508	1206592	-1	Positive
ENSG00000186827	TNFRSF4	5.22	7293	TNF receptor superfamily member 4 [Source:HGNC Symbol;Acc:HGNC:11918]	1	1211340	1214153	-1	Negative
ENSG00000196415	PRTN3	5.1	5657	proteinase 3 [Source:HGNC Symbol;Acc:HGNC:9495]	19	840999	848175	1	Positive
ENSG00000111181	SLC6A12	5.09	6539	solute carrier family 6 member 12 [Source:HGNC Symbol;Acc:HGNC:11045]	12	190077	214570	-1	Negative
ENSG00000106351	AGFG2	4.9	3268	ArfGAP with FG repeats 2 [Source:HGNC Symbol;Acc:HGNC:5177]	7	100539203	100568220	1	Negative
ENSG00000079432	CIC	4.5	23152	capicua transcriptional repressor [Source:HGNC Symbol;Acc:HGNC:14214]	19	42268537	42295797	1	Negative
ENSG00000198830	HMGN2	4.49	3151	high mobility group nucleosomal binding domain 2 [Source:HGNC Symbol;Acc:HGNC:4986]	1	26472440	26476642	1	Positive
ENSG00000100906	NFKBIA	4.44	4792	NFKB inhibitor alpha [Source:HGNC Symbol;Acc:HGNC:7797]	14	35401511	35404749	-1	Negative
ENSG00000042832	TG	4.44	7038	thyroglobulin [Source:HGNC Symbol;Acc:HGNC:11764]	8	132866958	133134903	1	Negative
ENSG00000184845	DRD1	4.4	1812	dopamine receptor D1 [Source:HGNC Symbol;Acc:HGNC:3020]	5	175440036	175444182	-1	Negative
ENSG00000198185	ZNF334	4.28	55713	zinc finger protein 334 [Source:HGNC Symbol;Acc:HGNC:15806]	20	46499630	46513559	-1	Positive
ENSG00000051009	FAM160A2	4.21	84067	family with sequence similarity 160 member A2 [Source:HGNC Symbol;Acc:HGNC:25378]	11	6211335	6234711	-1	Positive
ENSG00000154845	PPP4R1	3.95	9989	protein phosphatase 4 regulatory subunit 1 [Source:HGNC Symbol;Acc:HGNC:9320]	18	9546791	9615240	-1	Negative
ENSG00000032444	PNPLA6	3.94	10908	patatin like phospholipase domain containing 6 [Source:HGNC Symbol;Acc:HGNC:16268]	19	7534004	7561764	1	Negative
ENSG00000106665	CLIP2	3.82	7461	CAP-Gly domain containing linker protein 2 [Source:HGNC Symbol;Acc:HGNC:2586]	7	74289407	74405935	1	Negative
ENSG00000187984	ANKRD19P	3.82	NA	ankyrin repeat domain 19, pseudogene [Source:HGNC Symbol;Acc:HGNC:22567]	9	92809568	92838457	1	Positive
ENSG00000166716	ZNF592	3.78	9640	zinc finger protein 592 [Source:HGNC Symbol;Acc:HGNC:28986]	15	84748592	84806445	1	Negative
ENSG00000237686		3.75	NA	novel transcript, antisense to C6orf223	6	43995723	44074652	-1	Positive
ENSG00000140564	FURIN	3.63	5045	furin, paired basic amino acid cleaving enzyme [Source:HGNC Symbol;Acc:HGNC:8568]	15	90868588	90883458	1	Negative
ENSG00000279199		3.63	NA	novel transcript	17	40113215	40115442	-1	Positive
ENSG00000099381	SETD1A	3.49	9739	SET domain containing 1A, histone lysine methyltransferase [Source:HGNC Symbol;Acc:HGNC:29010]	16	30957754	30984664	1	Negative
ENSG00000283646	LINC02009	3.28	NA	long intergenic non-protein coding RNA 2009 [Source:HGNC Symbol;Acc:HGNC:52845]	3	46416524	46423591	-1	Positive
ENSG00000104415	CCN4	3.24	8840	cellular communication network factor 4 [Source:HGNC Symbol;Acc:HGNC:12769]	8	133191039	133231690	1	Negative
ENSG00000042062	RIPOR3	3.23	140876	RIPOR family member 3 [Source:HGNC Symbol;Acc:HGNC:16168]	20	50586108	50691542	-1	Negative
ENSG00000137880	GCHFR	3.09	2644	GTP cyclohydrolase I feedback regulator [Source:HGNC Symbol;Acc:HGNC:4194]	15	40764068	40767708	1	Negative
ENSG00000048052	HDAC9	2.99	9734	histone deacetylase 9 [Source:HGNC Symbol;Acc:HGNC:14065]	7	18086949	19002416	1	Positive
ENSG00000259408		2.78	NA	novel transcript, antisense to RYR3	15	33851785	33856809	-1	Negative
ENSG00000134690	CDCA8	2.53	55143	cell division cycle associated 8 [Source:HGNC Symbol;Acc:HGNC:14629]	1	37692481	37709719	1	Positive
